## Psychometric functions for the spotted seal (Amak) under water

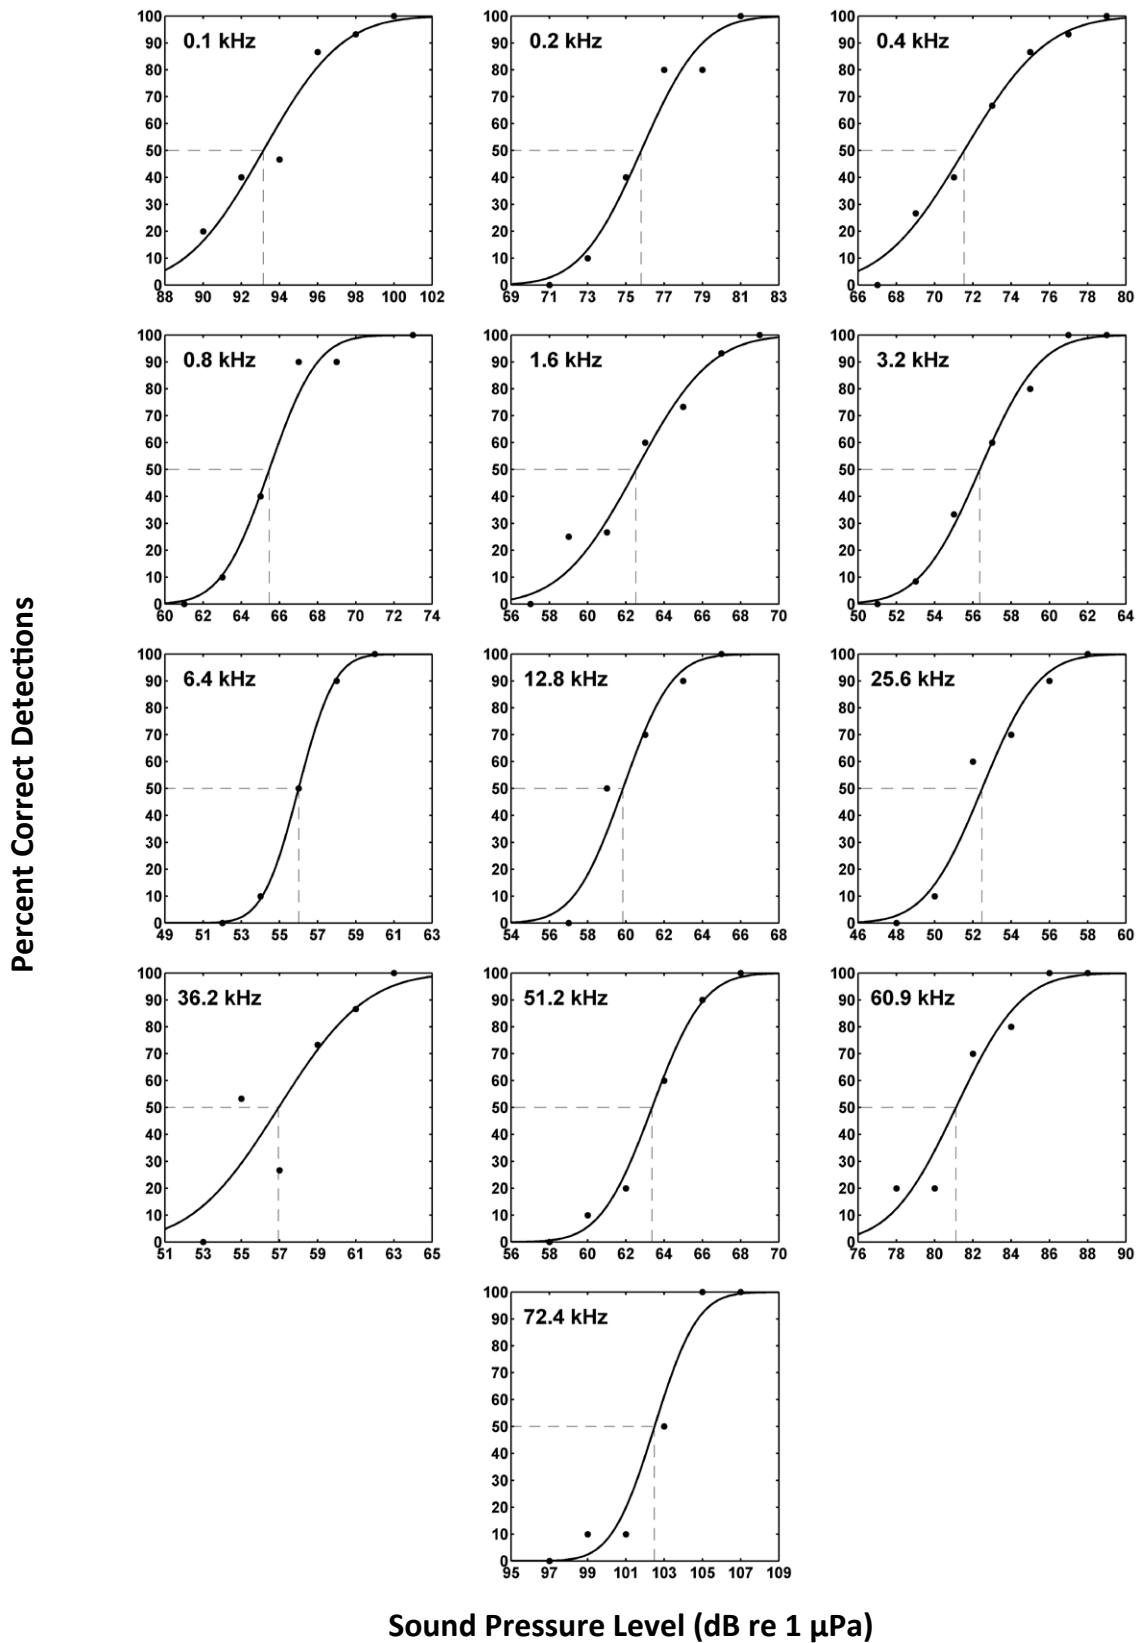

**Fig. S1.** The psychometric function obtained at each frequency underwater for the spotted seal Amak. On all plots, the x-axis represents sound pressure level in dB re. 1  $\mu$ Pa while the y-axis shows percent correct detection on signal-present trials. Probit analysis was used to fit these psychometric functions to the proportion of correct detections at each stimulus level presented during MCS testing. Threshold, defined as the 50% correct detection probability and indicated on these plots by the dashed lines, was determined using an inverse prediction (not shown).

## Psychometric functions for the spotted seal (Tunu) under water

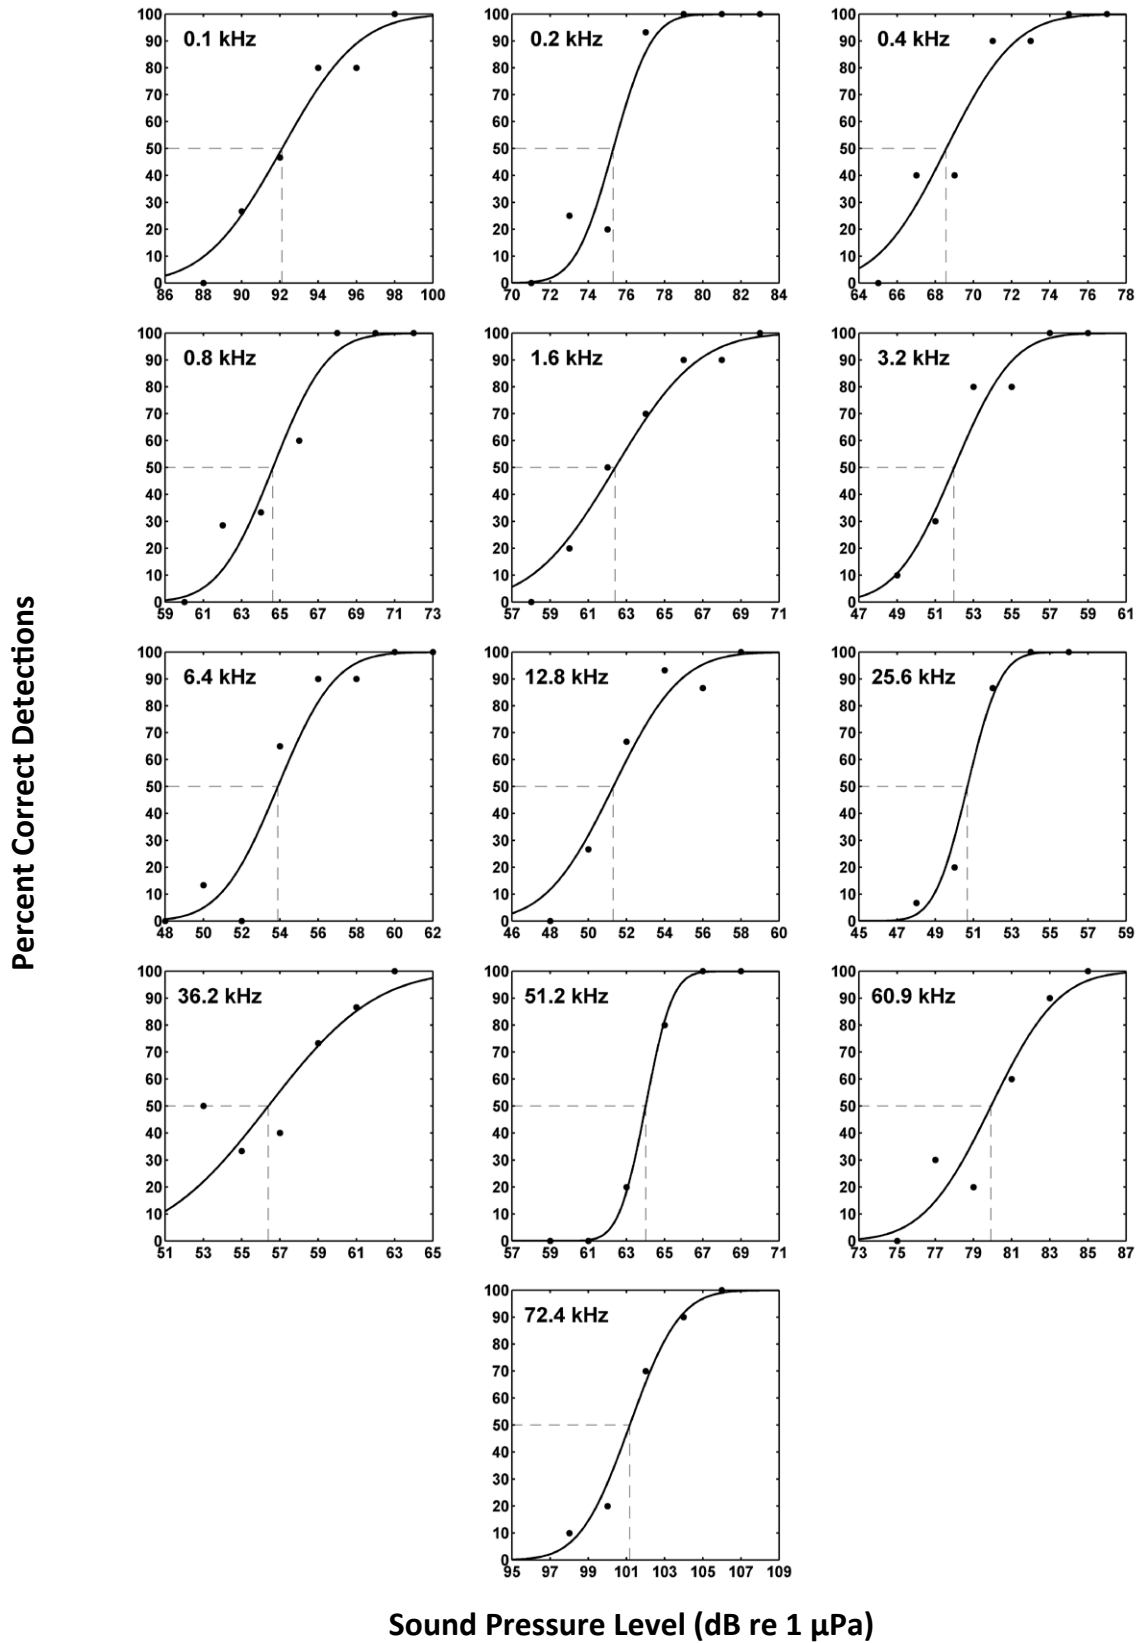

**Fig. S2.** The psychometric function obtained at each frequency underwater for the spotted seal Tunu. On all plots, the x-axis represents sound pressure level in dB re. 1  $\mu$ Pa while the y-axis shows percent correct detection on signal-present trials. Probit analysis was used to fit these psychometric functions to the proportion of correct detections at each stimulus level presented during MCS testing. Threshold, defined as the 50% correct detection probability and indicated on these plots by the dashed lines, was determined using an inverse prediction (not shown).

### Psychometric functions for the spotted seal (Amak) in air

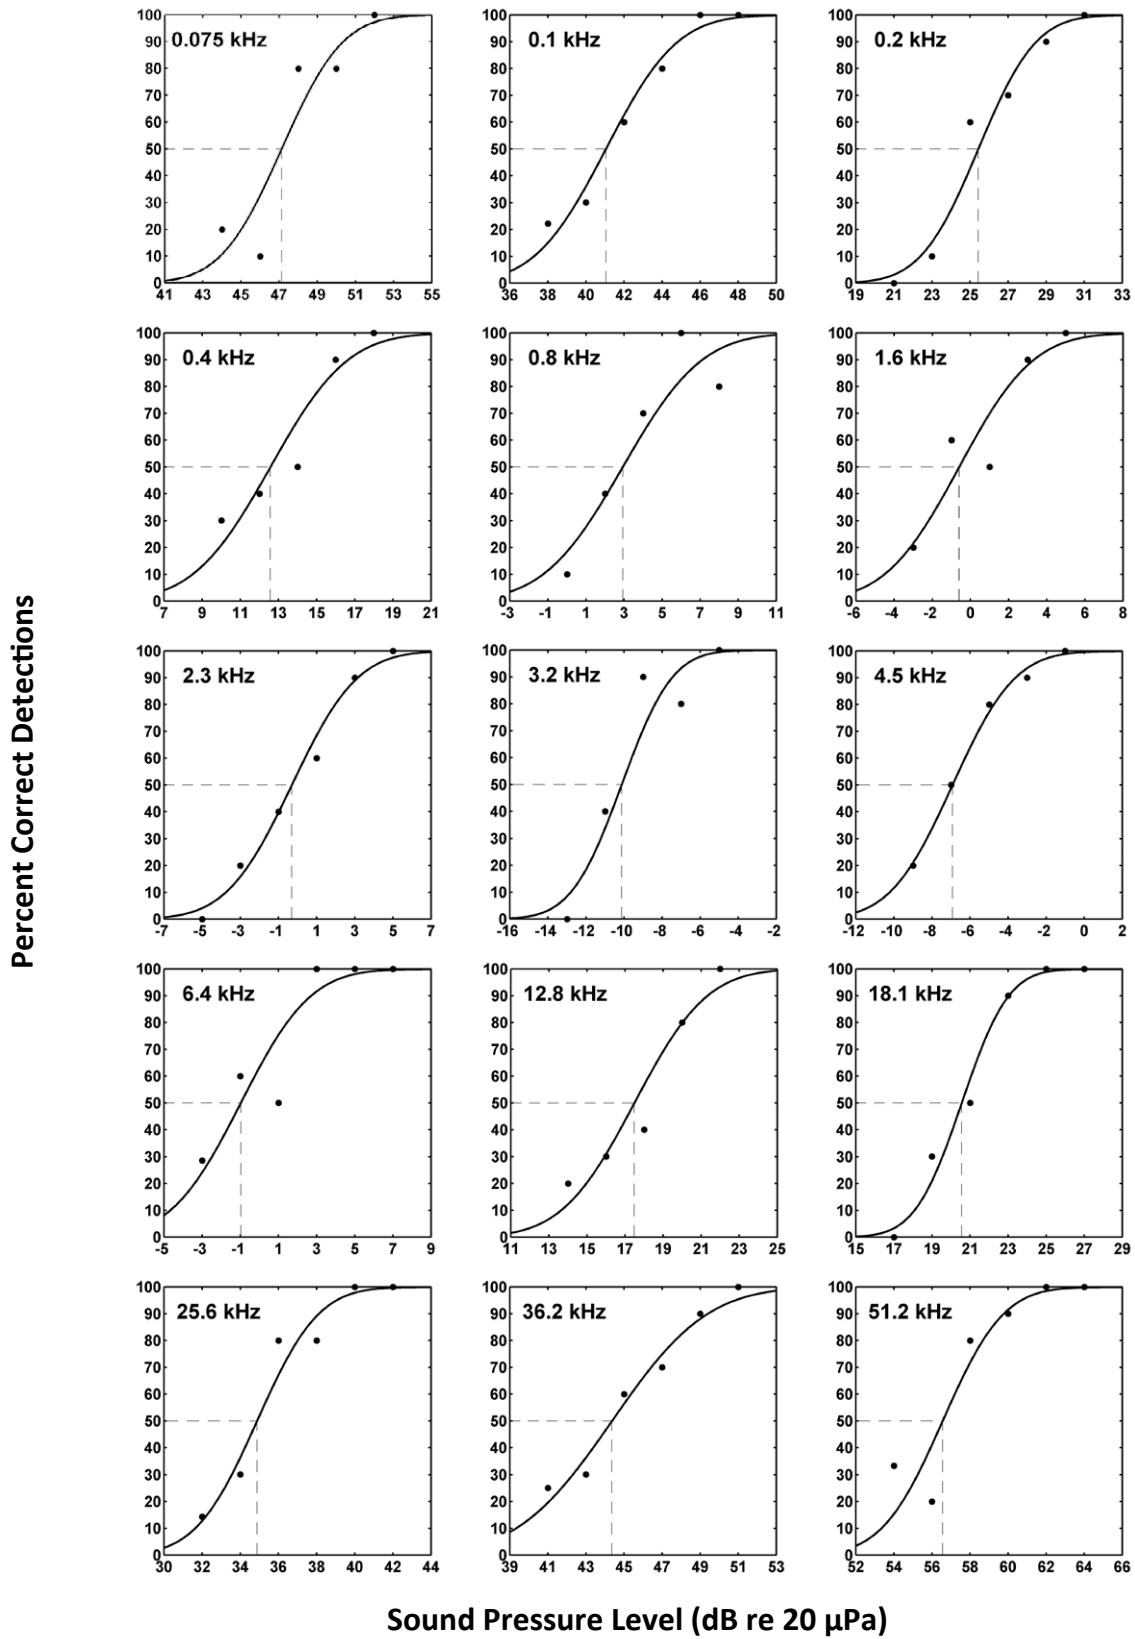

**Fig. S3.** The psychometric function obtained at each frequency in air for the spotted seal Amak. On all plots, the x-axis represents sound pressure level in dB re. 20  $\mu$ Pa while the y-axis shows percent correct detection on signal-present trials. Probit analysis was used to fit these psychometric functions to the proportion of correct detections at each stimulus level presented during MCS testing. Threshold, defined as the 50% correct detection probability and indicated on these plots by the dashed lines, was determined using an inverse prediction (not shown).

### Psychometric functions for the spotted seal (Tunu) in air

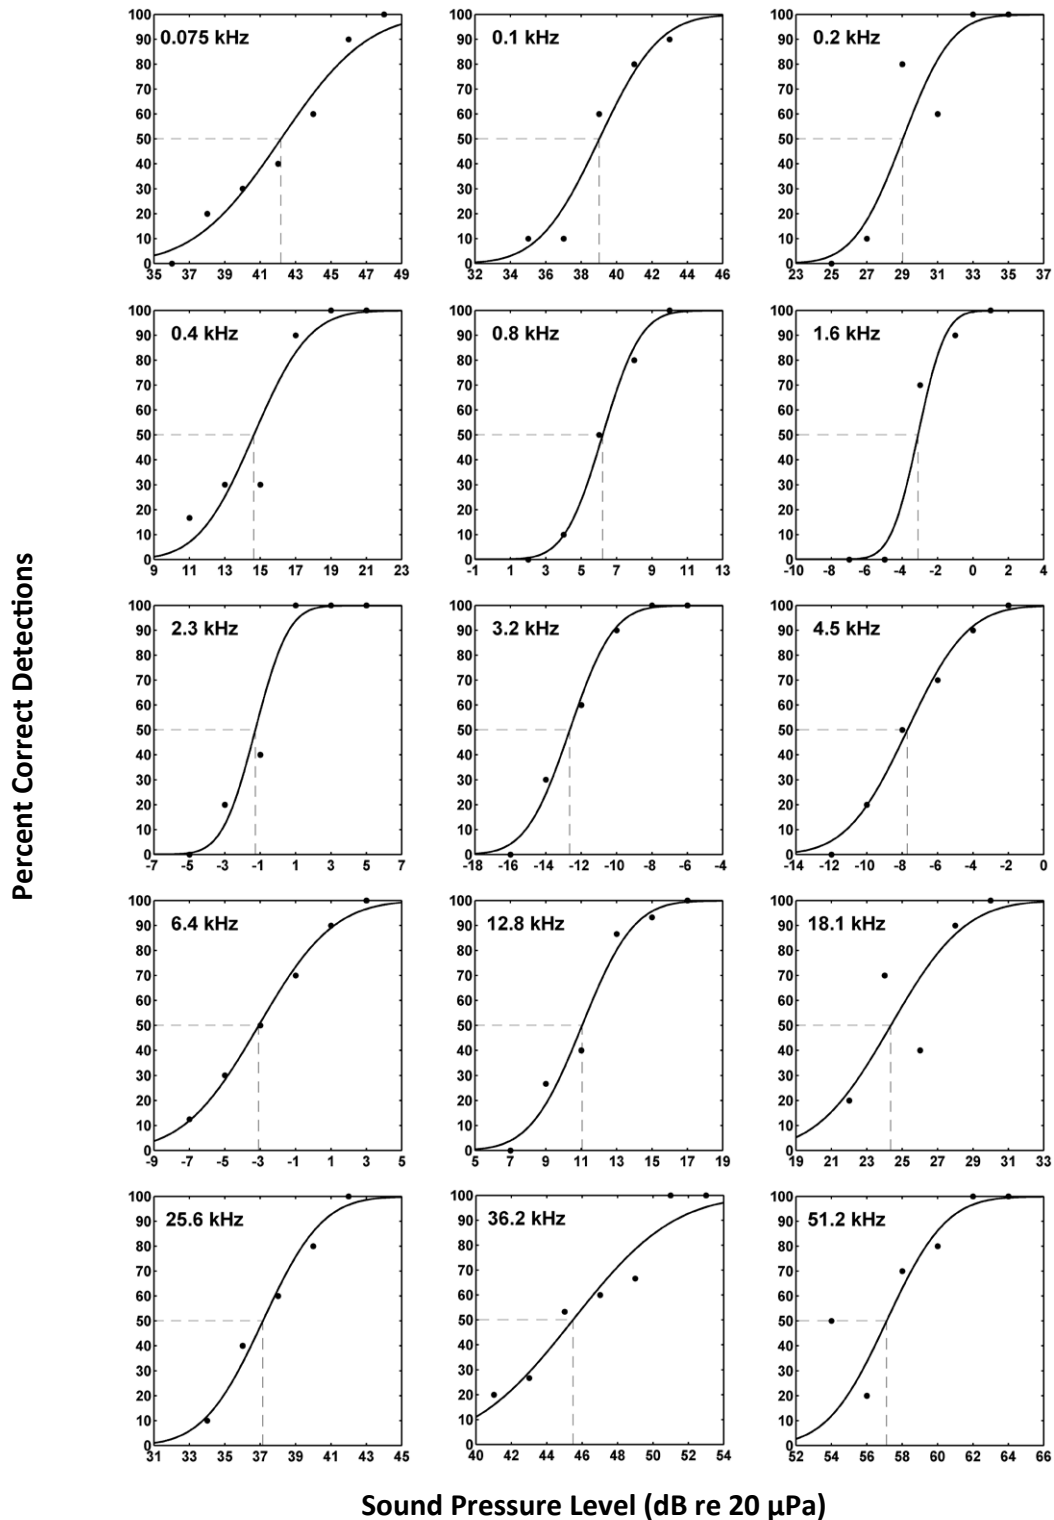

**Fig. S4. The psychometric function obtained at each frequency in air for the spotted seal Tunu.** On all plots, the x-axis represents sound pressure level in dB re. 20  $\mu$ Pa while the y-axis shows percent correct detection on signal-present trials. Probit analysis was used to fit these psychometric functions to the proportion of correct detections at each stimulus level presented during MCS testing. Threshold, defined as the 50% correct detection probability and indicated on these plots by the dashed lines, was determined using an inverse prediction (not shown). <sup>1</sup>A 2:1 reinforcement ratio was used for Amak at 72.4 kHz underwater. Amak exhibited a conservative response bias at this frequency (0% false alarm rate for five sessions with a 70:30 signal to catch ratio) until the reinforcement ratio was adjusted. <sup>2</sup>This amplifier was used for underwater audiogram testing at 6.4 kHz and below, and for the masking experiment at all frequencies. <sup>3</sup>At the two highest frequencies underwater – 12.8 and 25.6 kHz – variability in spectral density levels was  $\pm 9$  and  $\pm 7$  dB, respectively. This resulted from narrowband peaks or troughs in the noise that were unable to be filtered. The primary 1/3-octave band criterion was met for both frequencies.
